# Supplementary material for: The IGF-1 receptor inhibitor picropodophyllin potentiates the anti-myeloma activity of a BH3-mimetic
Source: PubMed Central journal article supplement (PMC4294345; doi:10.18632/oncotarget.1933), 2014-04-30
Supplement: oncotarget-05-11193-s001.pdf [file oncotarget-05-11193-s001.pdf]

# The IGF-1 receptor inhibitor picropodophyllin potentiates the anti-myeloma activity of a BH3-mimetic.

## Supplemental Material

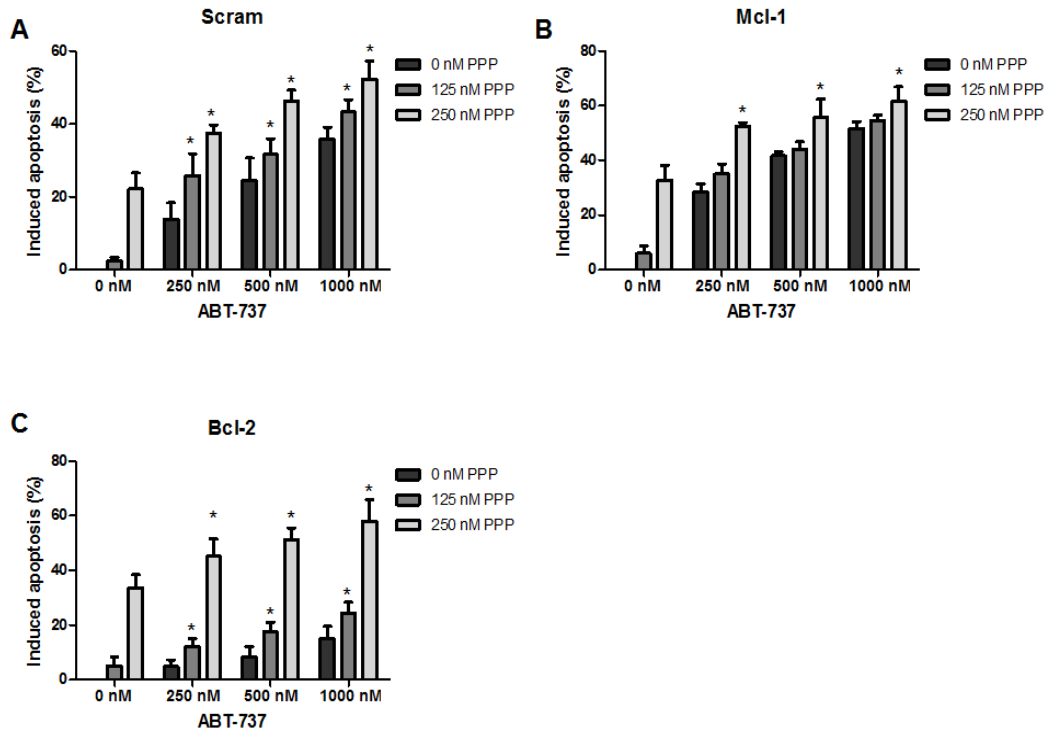

**Supplemental Figure 1: Effect of the combination of ABT-737 and PPP after Bcl-2 or Mcl-1 silencing.** RPMI-8226 cells were transfected with a control vector (scramble) (A) and vectors containing shRNA against Mcl-1 (B) or Bcl-2 (C). Cells were treated for 48h with ABT-737 (250, 500 and 1000 nM), PPP (125 and 250 nM) or the different combinations. The effect on apoptosis was evaluated by an AnnexinV-APC/7'AAD staining and the data is presented as the percentage induced apoptosis compared to untreated scrambled (A), shBcl-2 (C) or shMcl-1 (B) cells. Columns and error bars are the mean  $\pm$  SD from 3 individual experiments. \* indicates p value of  $<0.05$  compared to both single agents.

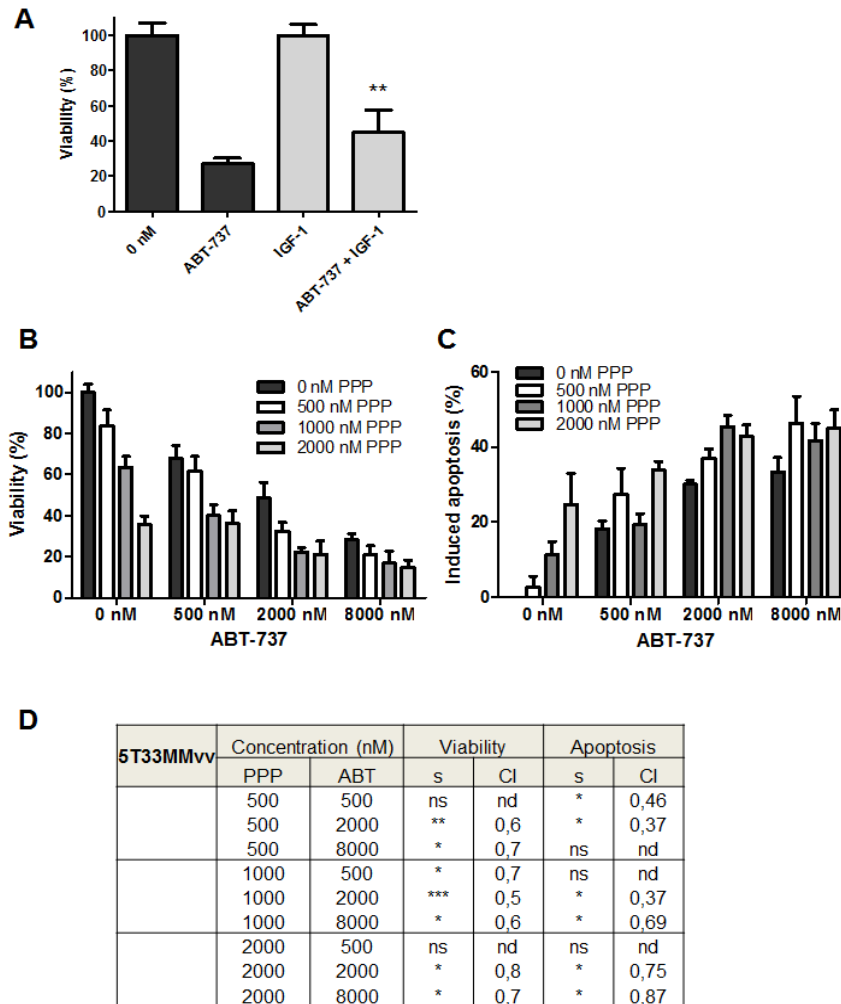

**Supplemental Figure 2: PPP and ABT-737 synergistically induce lethality in the murine 5T33MMv cells. A: IGF-1 protects 5T33MMv cells against ABT-737 induced cell death.**

Cells were isolated, serum starved for 1h and pre-stimulated or not with IGF-1 (200 ng/ml) for 2 hours before ABT- 737 (125 nM) was added. After 24 hours, the effect on cell viability was evaluated by using a CellTiter-Glo Assay. Results are expressed as the relative number of viable cells compared to control cells or IGF-1 condition. Bars and error bars indicate mean  $\pm$  SD of 4 independent experiments. \*\* indicates p values of  $\leq 0.01$  comparing ABT-737 alone versus ABT-737 with IGF-1. **B-D: PPP+ABT-737 synergistically decreased MM cell viability and induced apoptosis in the 5T33MMv cells.** Cells were cultured with 0  $\mu$ M (black bars), 0.5  $\mu$ M

(white), 1  $\mu$ M (dark grey) or 2  $\mu$ M (light grey) PPP either alone or in combination with indicated concentrations of ABT-737 for 24h. **B:** Effect on cell viability was evaluated by using a CellTiter-Glo Assay. Results are expressed as relative viability compared to control cells. Bars and error bars indicate mean  $\pm$  SD of at least 3 independent experiments. **C:** Effect on apoptosis was determined by an AnnexinV-FITC/7'AAD staining. Results are expressed as the percentage induced apoptosis. Symbols and error bars are the mean  $\pm$  SD from at least 3 individual experiments. **D:** Statistical analysis and combination index (CI) values. Significance and CI values were calculated for the different drug concentrations. Statistical significance was evaluated with a Mann-Whitney test using GraphPad Prism 5.0 software (ns = not significant, \* p <0.05, \*\* p <0.01, \*\*\* p<0.005 compared to both single agents). CI values were calculated by the Chou and Talalay method using CompuSyn 1.0 software (nd = not determined, CI<1 = synergistic).

**Supplemental Table 1: Patient characteristics and previous treatment**

ISS: International Staging System at diagnosis;  $\lambda$ : lambda, k: kappa; VAD: vincristine-doxorubicin-dexamethasone; ASCT: autologous stem cell transplantation; Vel: velcade; dex: dexamethasone; Pred: prednisolone; Rev: revlimid; Dox: doxorubicin; CTD: cyclophosphamide-thalidomide-dexamethasone; cytogenetics: molecular background at time of biopsy; ND: not determined; NA: not available.

| Patient       | ISS | Isotype       | Previous treatment                                      | cytogenetics                            |
|---------------|-----|---------------|---------------------------------------------------------|-----------------------------------------|
| patient 1     | ND  | IgG $\lambda$ | VAD, ASCT, ASCT, Vel-DEX-Panabinstat                    | NA, normal at last relapse              |
| patient 2 (1) | 3   | IgG k         | Vel-DEX, ASCT                                           | t(4;14)                                 |
| patient 2 (2) | 3   | IgG k         | Vel-DEX, ASCT, VEL-DEX                                  | t(4;14)                                 |
| patient 3     | ND  | IgG k         | New                                                     | NA, loss of chr Y                       |
| patient 4     | 3   | IgG k         | VAD, Vel-Pred, Rev-Dex                                  | Normal                                  |
| patient 5     | 2   | Light chain k | VAD, ASCT, Vel-Dox, Rev, Rev-Dex, VRPred, Vel-DEX, ASCT | NA, normal at last relapse              |
| patient 6     | 1   | IgG k         | Vel-DEX                                                 | NA, hyperdiploid karyotype at diagnosis |
| patient 7     | 3   | Light chain k | Vel-DEX, ASCT                                           | NA, Normal at diagnosis                 |
| patient 8     | 2   | IgG k         | New                                                     | Del13q, normal karyotype                |
| patient 9     | 1   | IgA $\lambda$ | CTD                                                     | Del13q, karyotype ND                    |
